# Supplementary material for: In Silico Studies on Zinc Oxide Based Nanostructured Oil Carriers with Seed Extracts of Nigella sativa and Pimpinella anisum as Potential Inhibitors of 3CL Protease of SARS-CoV-2
Source: MDPI journal article supplement (doi:10.3390/molecules27134301), 2022-07-04

# **In Silico Studies on Zinc Oxide based Nanostructured Oil Carriers with Seed Extracts of *Nigella sativa* and *Pimpinella anisum* as Potential Inhibitors of 3CL Protease of SARS-CoV-2**

**Awatif A. Hendi <sup>1</sup>, Promy Virk <sup>2,\*</sup>, Manal A. Awad <sup>3</sup>, Mai Elobeid <sup>2</sup>, Khalid M. O. Ortashi <sup>4</sup>,  
Meznah M. Alanazi <sup>1</sup>, Fatemah H. Alkallas <sup>1</sup>, Maha Mohammad Almoneef <sup>1</sup> and  
Mohammed Aly Abdou <sup>5</sup>**

<sup>1</sup> Department of Physics, College of Science, Princess Nourah Bint Abdulrahman University, P.O. Box 84428, Riyadh 11671, Saudi Arabia; aahindi@pnu.edu.sa (A.A.H.); mmalenazy@pnu.edu.sa (M.M.A.); fhalkallas@pnu.edu.sa (F.H.A.); mmalmoneef@pnu.edu.sa (M.M.A.)

<sup>2</sup> Department of Zoology, College of Sciences, King Saud University, P.O. Box: 2455, Riyadh, 11451, Saudi Arabia; melobeid@ksu.edu.sa

<sup>3</sup> King Abdullah Institute for Nanotechnology, King Saud University, Riyadh 11451, Saudi Arabia; mawad@ksu.edu.sa

<sup>4</sup> Department of Chemical Engineering, King Saud University, Riyadh 11421, Saudi Arabia; ortashi9@ksu.edu.sa

<sup>5</sup> Department of Physics, College of Sciences, University of Bisha, P.O. Box 344, Bisha 61922, Saudi Arabia; m\_abdou\_eg@yahoo.com

\* Correspondence: bvirk@ksu.edu.sa; Tel: +966-15-0220-5785

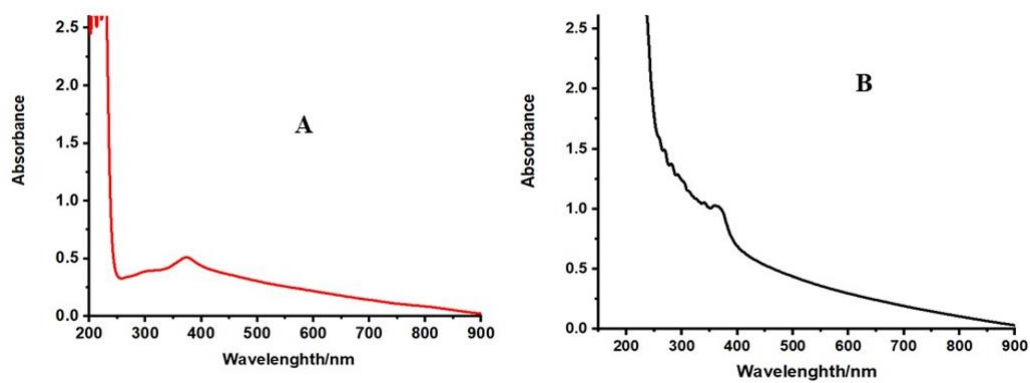

**Figure S1.** The UV-visible absorption spectra of synthesized (A) ZnO NPs (B) ZnO NPs-NLC.

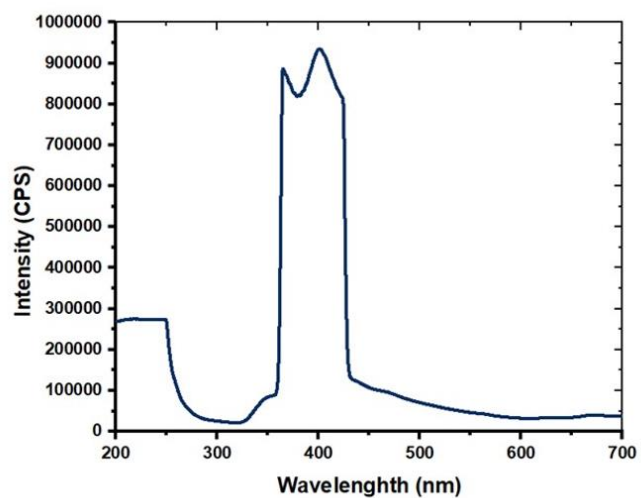

**Figure S2.** The emission spectrum of synthesized ZnO NPs.

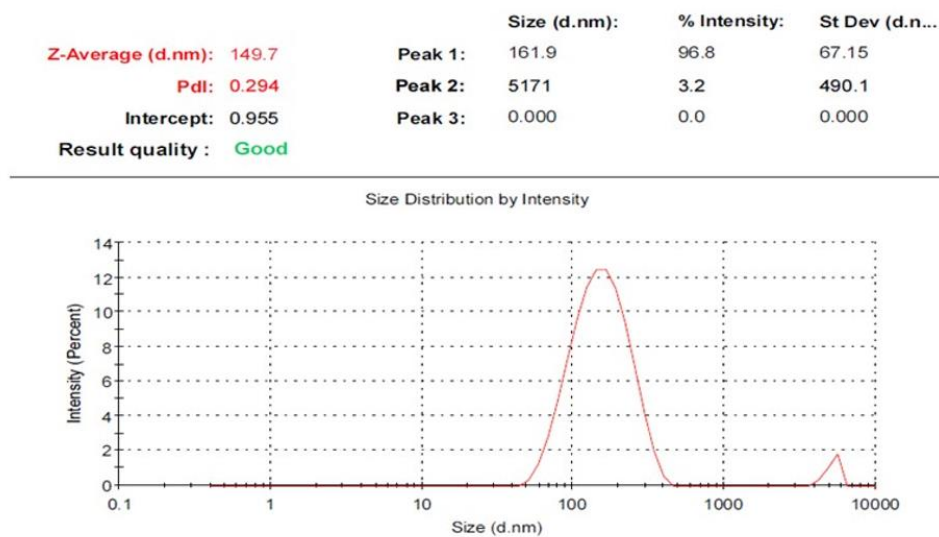

**Figure S3.** Particle size and polydispersity index of the ZnNPs.

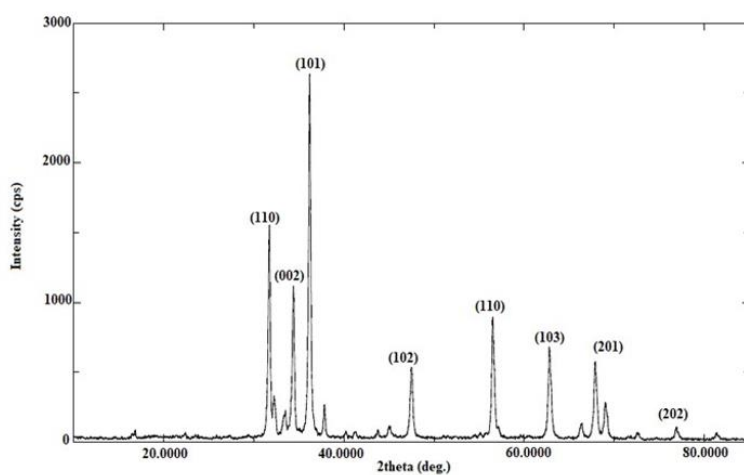

**Figure S4.** X-Ray diffraction pattern and diffraction angles peaks of synthesized ZnO NPs–NLC.

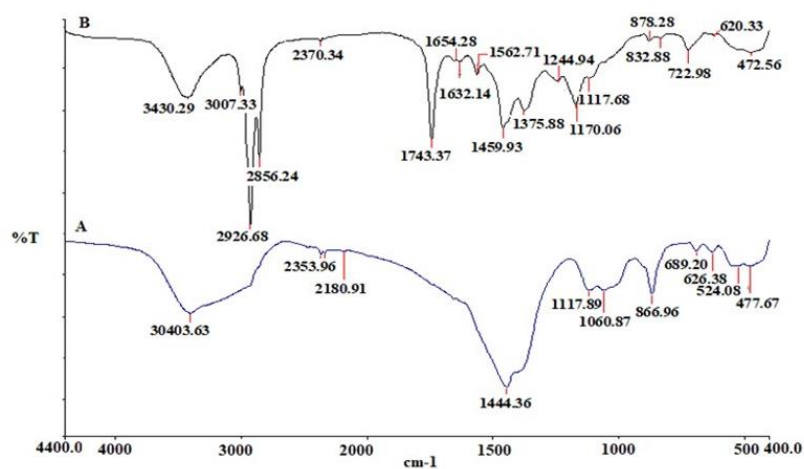

**Figure S5.** FT-IR spectra of synthesized (A) ZnO NPs (B) ZnO NPs-NLC.

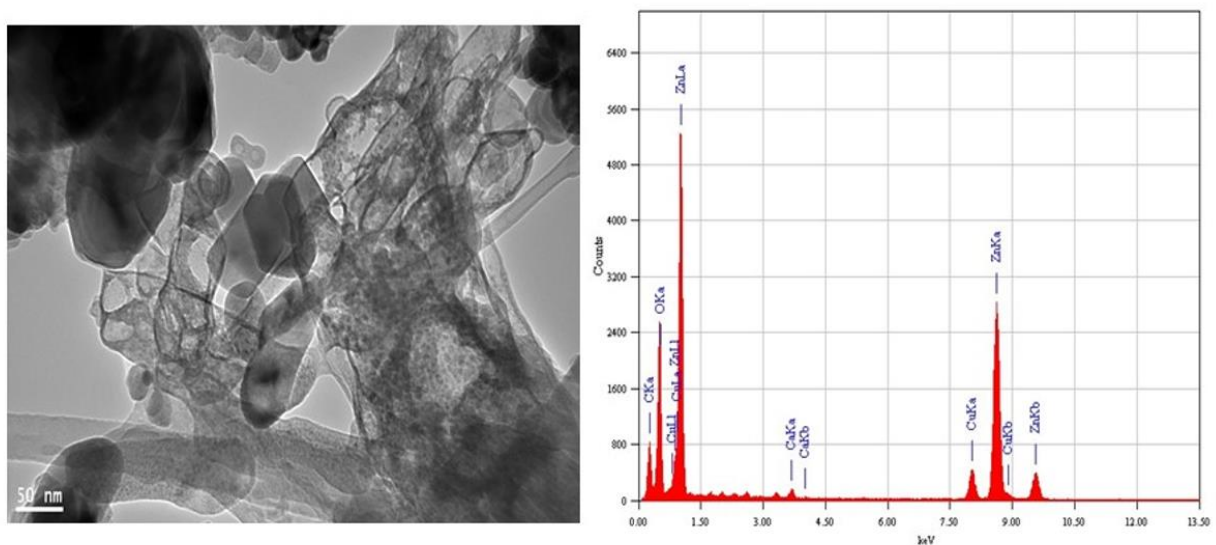

**Figure S6.** TEM micrograph and EDX spectrum of synthesized ZnO NPs.

**Table S1:** Structures of constituent compounds.

|                          | Bioactive compounds                                                                                                                                                                                                                                                                                                                                                                                                                                                                                                                                                                                                                                                                                                                                                                                                                                                                                                                                                                                                                                                                                                                                                                                                                                                                                                                                                                                                                                                                                                                                                                                                                                                                                                                                                                           |
|--------------------------|-----------------------------------------------------------------------------------------------------------------------------------------------------------------------------------------------------------------------------------------------------------------------------------------------------------------------------------------------------------------------------------------------------------------------------------------------------------------------------------------------------------------------------------------------------------------------------------------------------------------------------------------------------------------------------------------------------------------------------------------------------------------------------------------------------------------------------------------------------------------------------------------------------------------------------------------------------------------------------------------------------------------------------------------------------------------------------------------------------------------------------------------------------------------------------------------------------------------------------------------------------------------------------------------------------------------------------------------------------------------------------------------------------------------------------------------------------------------------------------------------------------------------------------------------------------------------------------------------------------------------------------------------------------------------------------------------------------------------------------------------------------------------------------------------|
| <i>Pimpinella anisum</i> | <p>eugenol, <i>trans</i>-anethole, methylchavicol, anisaldehyde, estragole, coumarins, scopoletin, umbelliferone, estrols, terpene hydrocarbons, polyenes, and polyacetylenes</p> <div style="display: flex; flex-wrap: wrap; justify-content: space-around;"> <div style="text-align: center;"> 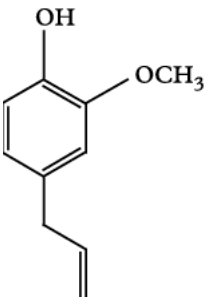 <p>eugenol</p> </div> <div style="text-align: center;"> <p>(h)</p>  <p><i>trans</i>-anethole</p> </div> <div style="text-align: center;">  <p>methylchavicol</p> </div> <div style="text-align: center;">  <p>estragole</p> </div> <div style="text-align: center;">  <p>anisaldehyde</p> </div> <div style="text-align: center;">  <p>coumarin</p> </div> <div style="text-align: center;">  <p>Scopoletin</p> </div> <div style="text-align: center;">  <p>Umbelliferone</p> </div> <div style="text-align: center;">  <p>estrol</p> </div> <div style="text-align: center;">  <p>Sesquiterpene: Himachalene</p> </div> </div> |

|                              |                                                                                                                                                                                                                                                                                                                                                                                                                                                                                                                                                                                                                                                                                                                                                                                                                                                                                                                                                                                                                                                                                                                                                                                                                                                                                                                                                                                                                                                                                                                                                                                                                                                                                                                                                                                                                                                                                                                                                                                                                                                                                                                                   |
|------------------------------|-----------------------------------------------------------------------------------------------------------------------------------------------------------------------------------------------------------------------------------------------------------------------------------------------------------------------------------------------------------------------------------------------------------------------------------------------------------------------------------------------------------------------------------------------------------------------------------------------------------------------------------------------------------------------------------------------------------------------------------------------------------------------------------------------------------------------------------------------------------------------------------------------------------------------------------------------------------------------------------------------------------------------------------------------------------------------------------------------------------------------------------------------------------------------------------------------------------------------------------------------------------------------------------------------------------------------------------------------------------------------------------------------------------------------------------------------------------------------------------------------------------------------------------------------------------------------------------------------------------------------------------------------------------------------------------------------------------------------------------------------------------------------------------------------------------------------------------------------------------------------------------------------------------------------------------------------------------------------------------------------------------------------------------------------------------------------------------------------------------------------------------|
| <p><i>Nigella Sativa</i></p> | <p>thymoquinone (30%-48%), thymohydroquinone, dithymoquinone, <i>p</i>-cymene (7%-15%), carvacrol (6%-12%), 4-terpineol (2%-7%), <i>t</i>-anethole (1%-4%), sesquiterpene longifolene <math>\alpha</math>-pinene and thymol</p>                                                                                                                                                                                                                                                                                                                                                                                                                                                                                                                                                                                                                                                                                                                                                                                                                                                                                                                                                                                                                                                                                                                                                                                                                                                                                                                                                                                                                                                                                                                                                                                                                                                                                                                                                                                                                                                                                                   |
|                              | <div style="display: flex; flex-wrap: wrap; justify-content: space-around;"> <div style="text-align: center;"> 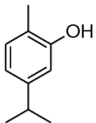 <p><b>Carvacrol</b></p> </div> <div style="text-align: center;">  <p><b>δ-Hederin</b></p> </div> <div style="text-align: center;">  <p><b>Thymoquinone</b></p> </div> <div style="text-align: center;">  <p><b>Dithymoquinone</b></p> </div> <div style="text-align: center;">  <p><b>Nigellone</b></p> </div> <div style="text-align: center;">  <p><b>Thymol</b></p> </div> <div style="text-align: center;">  <p><b>Thymoquinone</b></p> </div> <div style="text-align: center;">  <p><b>Thymohydroquinone</b></p> </div> <div style="text-align: center;">  <p><b>Thymol</b></p> </div> <div style="text-align: center;">  <p><b><i>p</i>-cymene</b></p> </div> <div style="text-align: center;">  <p><b>4-terpineol</b></p> </div> <div style="text-align: center;">  <p><b><i>t</i>-anethole</b></p> </div> <div style="text-align: center;">  <p><b>sesquiterpene longifolene</b></p> </div> </div> |
| <p>Zinc Oxide</p>            |                                                                                                                                                                                                                                                                                                                                                                                                                                                                                                                                                                                                                                                                                                                                                                                                                                                                                                                                                                                                                                                                                                                                                                                                                                                                                                                                                                                                                                                                                                                                                                                                                                                                                                                                                                                                                                                                                                                                                                                                                                                |

Olive Oil

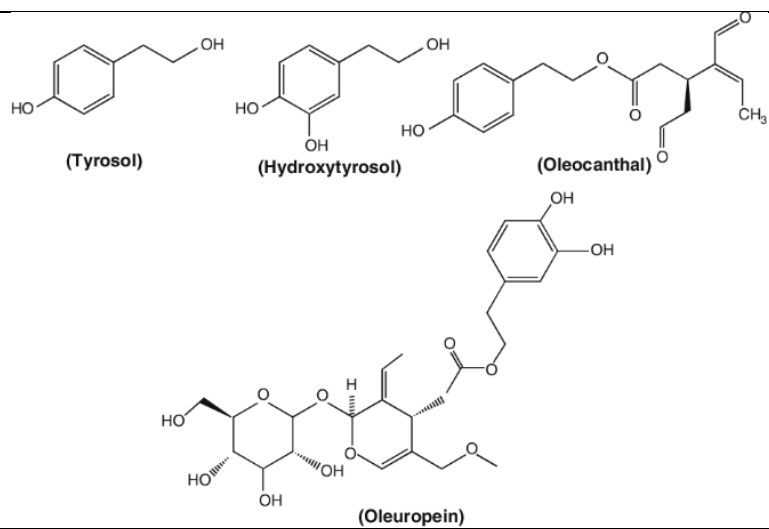

Supplement: s1 [file s1]
